# Supplementary material for: Highly compression-tolerant and durably hydrophobic macroporous silicone sponges synthesized by a one-pot click reaction for rapid oil/water separation
Source: Royal Society of Chemistry journal article supplement (doi:10.1039/c8ta07327a), 2018-01-01
Supplement: c8ta07327a1.pdf [file c8ta07327a1.pdf]

## Supporting Information

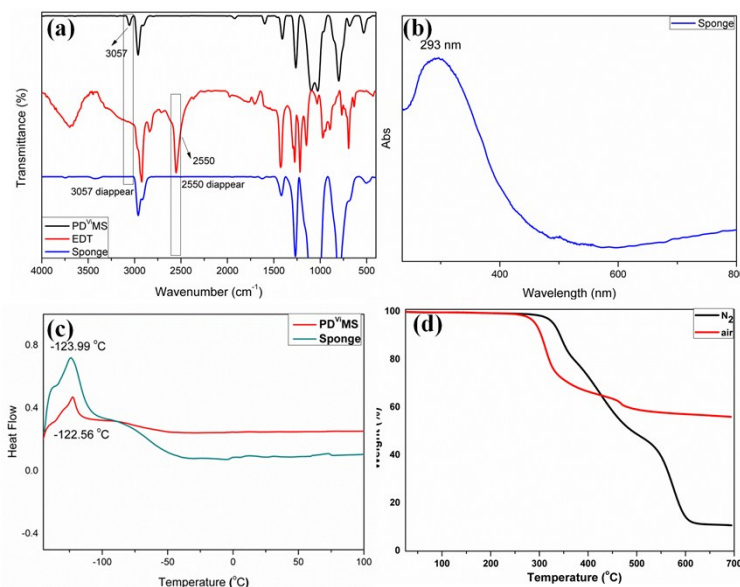

**Figure S1** (a) The Fourier transform infrared spectroscopy (FT-IR) spectra of PDVMS, EDT, and SS1. (b) UV absorption spectrum of SS1. (c) DSC curves of PDVMS and SS1 under N<sub>2</sub> at 10 °C min<sup>-1</sup>. (d) TGA curves of SS1 under nitrogen and air at 10 °C min<sup>-1</sup>.

**Table S1** Elemental analysis of the sponge SS1.

| SS1        | C %   | H %   | N % | S %    |
|------------|-------|-------|-----|--------|
| calculated | 35.26 | 7.386 | 0   | 14.260 |
| found      | 35.60 | 7.664 | 0   | 13.806 |

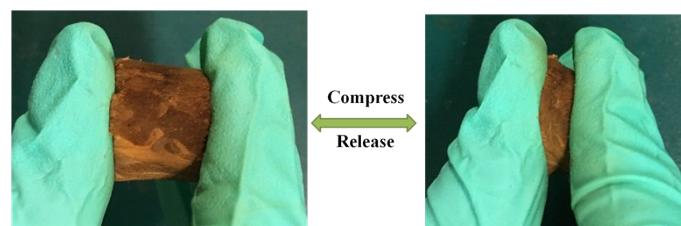

**Figure S2** The digital photographs of the manual compression and recover to its original shape for the SS1 after being heated.

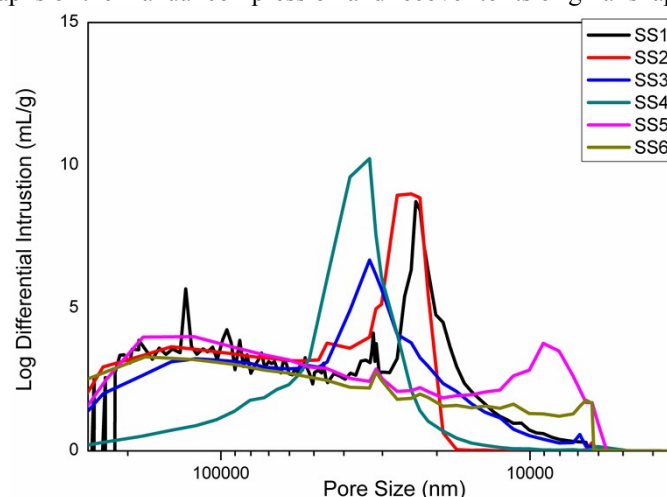

**Figure S3** Pore size distribution of SS1, SS2, SS3, SS4, SS5, and SS6 obtained by mercury porosimetry.

**Table S2** Information of the sponges obtained by mercury porosimetry.

| Samples | porosity | bulk density | (average)<br>4V/A | median pore<br>radius v nm | median<br>pore radius | V <sub>total</sub> |
|---------|----------|--------------|-------------------|----------------------------|-----------------------|--------------------|
|---------|----------|--------------|-------------------|----------------------------|-----------------------|--------------------|

|     |      |       |         |       | A nm  |        |
|-----|------|-------|---------|-------|-------|--------|
| SS1 | 87.2 | 0.173 | 66082.1 | 60140 | 27395 | 4.9564 |
| SS2 | 86.7 | 0.175 | 61743.6 | 60020 | 28660 | 4.9517 |
| SS3 | 85.3 | 0.186 | 53445.7 | 39750 | 27320 | 4.5819 |
| SS4 | 81.1 | 0.242 | 42365.6 | 41510 | 35240 | 3.3532 |
| SS5 | 81.4 | 0.162 | 52539.4 | 62100 | 11800 | 5.0305 |
| SS6 | 64.0 | 0.160 | 45465.8 | 72500 | 13900 | 3.9970 |

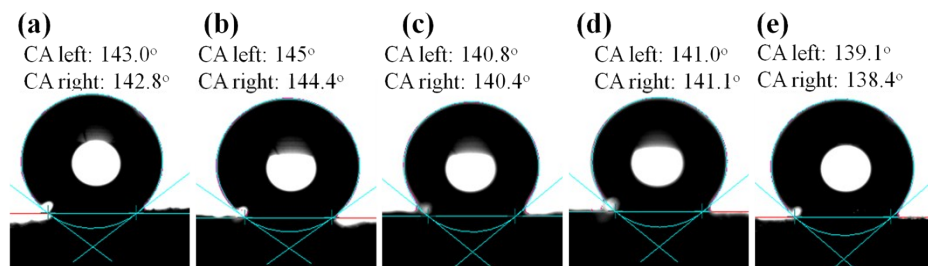

**Figure S4** Contact angle measurements of water droplets on the SS1 surface after (a) being exposed to 365 nm UV irradiation for 5 h, (b) heating at 150 °C for 5 h, (c) immersing in water of pH=1 and (d) pH=13 for 5 h, (e) successive 20 times cyclic compression .
